# Supplementary material
Source: PubMed Central journal article supplement (PMC11072310)
Supplement: 18_2022_4147_MOESM1_ESM.pdf [file 18_2022_4147_MOESM1_ESM.pdf]

**Table S1. Primers used for qRT-PCR and cloning**

| Genes                          | Forward primer sequences:                                                    | Reverse primer sequences                                                   |
|--------------------------------|------------------------------------------------------------------------------|----------------------------------------------------------------------------|
| <i>Runx2</i>                   | TCCTGTAGATCCGAGCACCA                                                         | CTGCTGCTGTTGTTGCTGTT                                                       |
| <i>Alp</i>                     | CCAGAAAGACACCTTGACTGTGG                                                      | TCTTGTCCGTGTCGCTCACCAT                                                     |
| <i>Osterix</i>                 | GGCTTTTCTGCGGCAAGAGGTT                                                       | CGCTGATGTTTGCTCAAGTGGTC                                                    |
| <i>Bsp</i>                     | AATGGAGACGGCGATAGTTCCG                                                       | GGAAAGTGTGGAGTTCTCTGCC                                                     |
| <i>Opn</i>                     | GCTTGGCTTATGGACTGAGGTC                                                       | CCTTAGACTCACCGCTCTTCATG                                                    |
| <i>β-actin</i>                 | AAGACCTCTATGCCAACACAG                                                        | GGAGGAGCAATGATCTTGATC                                                      |
| <i>MTSS1</i>                   | CACCTGAAGCTGCCAACCAAGTT                                                      | AGCGTAGTCAGGAAGGTGGACA                                                     |
| <i>Src</i>                     | GTTGCTTCGGAGAGGTGTGGAT                                                       | CACCAGTTTCTCGTGCCTCAGT                                                     |
| <i>Src full-length cloning</i> | TTGGTACCGAGCTCGGATCCGCCACC<br>ATGGGCAGCAACAAGAGCAA                           | GCTGGATATCTGCAGAATTCCTAT<br>AGGTTCTCCCCGGGCTGGTACT                         |
| <i>MTSS1</i> shRNA oligo pair  | GATCCGTAGACAACCTGGTTGGCAGC<br>TTCAAGAGAGCTGCCAACCAAGTTGT<br>CTATTTTTTACGCGTG | AATTCACGCGTAAAAAATAGACAAC<br>TGGTTGGCAGCTCTCTTGAAGCTG<br>CCAACCAGTTGTCTACG |

---

**Table S2. siRNA sequences used for gene silencing**

| Genes         | Sense sequences       | Antisense sequences   |
|---------------|-----------------------|-----------------------|
| MTSS1 siRNA-1 | GCAAUAUACCCUCUCCUUTT  | AAGGAAGAGGGUAUAUUGCTT |
| MTSS1 siRNA-2 | GCUGCCAACCAGUUGUCUATT | UAGACAACUGGUUGGCAGCTT |

---
